# Supplementary material
Source: publisher site journal article supplement (https://www.dovepress.com/get_supplementary_file.php?f=338079.docx)
Supplement: Supplementary file 1 [file get_supplementary_file.php]

**Supplementary table 1- Description of studies included**

| **Study** | **Years studied** | **Country** | **Type of study** | **Population studied** | **Variable measured** | **Outcome measured** | **Findings** | **Quality of study** |
| --- | --- | --- | --- | --- | --- | --- | --- | --- |
| Akhtar1 | 2014 | Qatar | Retrospective analysis of stroke registry | 894 patients with Stroke | ED LOS | Mortality  Quality of care (Hospital LOS) | ED LOS <8 hours was associated with lower hospital LOS in-hospital mortality (1.5% vs. 5.4 %) | Good |
| Al-Qathani2 | 2010-2012 | Saudi Arabia | Retrospective analysis of prospectively collected data | 940 critically-ill patients | Boarding Time | ICU and Hospital Mortality | Boarding time of 6-24 and > 24 hours was associated with higher ICU and hospital mortality compared to < 6 hours. | Good |
| Anneveld 3 | 2012 | Netherland | Survey | ED nurses and physicians | NEDOCS | Perception of care (perception of overcrowding) | Moderate agreement between NEDOCS score and feeling overcrowded | Good |
| Bayley4 | 1999-2000 | USA | Prospective cohort | 817 patients with chest pain | Boarding time | Quality of care (Hospital LOS) | No association between boarding time and hospital LOS | Good |
| Ben-Yakov5 | 2003-2008 | Canada | Retrospective cohort | 9,759 patients with CVA or TIA | ED LOS  ED volume | Mortality  Quality of care | No association between ED LOS and mortality  Increases ED volume negatively impacts some quality metrics (TTE, neurology consultation, referral) but not all (brain imaging) | Good |
| Berg6 | 2009-2016 | Sweden | Retrospective registry | 705,699 adult patients | ED LOS  ED occupancy | Mortality | Higher ED LOS or occupancy associated with higher 10-day mortality | Good |
| Bernstein7 | 2002 | USA | Prospective observational | Nurse and attending physician survey, 255 times over 5-week period | EDWIN | Perception of care (perception of overcrowding) Quality of care (LWOT, diversion status, return within 72 hours) | EDWIN score correlated well with ED staff perception of overcrowding and diversion status.  EDWIN scores did not correlate well with LWOT and return within 72 hours | Fair |
| Bullard8 | 2001-2007 | Canada | Prospective observational | 362,488 adult patients | ED Volume  Boarding time | Quality of care (LWOT, timely care) | Higher ED volume and boarding time associated with increased time from triage to physician and increased LWOT | Good |
| Carr9 | 2003 | USA | Retrospective case control | 509 intubated trauma patients | ED LOS | Quality of care (Hospital LOS, pneumonia) | Higher ED LOS was associated with higher risk of pneumonia and higher hospital LOS | Good |
| Chalfin10 | 2000-2003 | USA | Cross sectional analysis of administrative database | 50,332 critically-ill patients | ED boarders | Mortality  Quality of care (ICU and Hospital LOS) | ED boarding time >6 hours was associated with higher hospital mortality, and higher LOS | Good |
| Chatterje11 | 2005-2008 | USA | Retrospective | 253 patients with acute stroke | ED number of boarders  ED occupancy  ED LOS  Waiting room census | Quality of care (timely care) | Crowding associated with worse timeliness of care in patients presenting more than 3 hours after symptoms, but not those presenting within 3 hours. | Good |
| Derose12 | 2008-2010 | USA | Retrospective | 136,740 patients | ED boarding time  ED LOS  ED Occupancy | Mortality  Quality of Care (hospital LOS) | No association with mortality  Boarding time and ED LOS associated with higher hospital LOS | Good |
| Diercks13 | 2003-2005 | USA | Retrospective | 42,780 patients with NSTEMI | ED LOS | Mortality  Quality care (recurrent MI, timely care) | No association with in hospital morality  ED LOS > 8 hours has higher risk of recurrent MI and appropriate timely medications | Good |
| Epstein14 | 2004 | USA | Retrospective Cohort | 533 patients with MI, asthma or dislocation | ED occupancy  EDWIN | Quality Care (medical errors) | Highest quartiles had two-fold risk of having preventable medical errors compared to lowest quartile | Good |
| Fee15 | 2004-2005 | USA | Retrospective cross-sectional | 405 patients with CAP | ED Volume  ED Boarders | Quality of care (timely care) | ED volume and boarders increase associated with lower likelihood of receipt of antibiotics within 4 hours | Good |
| Fee16 | 2005-2005 | USA | Secondary analysis of retrospective cross-sectional | 407 patients | ED volume | Quality of care (timely care) | Ed volume associated with increased time to chest X-ray and time to antibiotics | Good |
| Gaieski17 | 2010-2015 | USA | Retrospective cohort | 2,913 patients with severe sepsis | ED occupancy  ED LOS  ED Boarders  ED waiting room census | Mortality  Quality of care (timely care) | No association with mortality  Higher occupancy, ED LOS and boarders but not waiting room census associated with worse timely care. | Good |
| Garcia-Romero18 | 2014 | Colombia | Prospective observational | Medical staff, charge nurses | NEDOCS | Perception of care (perception of overcrowding) | Moderate correlation between NEDOCS and subjective perception of overcrowding | Good |
| Gilligan19 | 2004-2005 | UK | Retrospective cohort analysis | 13,358 patients | Boarding time | Mortality  Quality of care (MRSA infection) | No independent association with mortality or MRSA infection | Fair |
| Guttman20 | 2003-2007 | Canada | Retrospective cohort analysis | 14,551,553 patients | ED LOS | Mortality  Quality of care (LWOT) | Increased ED LOS is associated with higher mortality rates  LWOT not associated with ED LOS | Good |
| Han21 | 2004-2007 | USA | Before/ after expansion of ED study | 40,978 patients | ED volume  ED occupancy  ED LOS  ED waiting room census | Quality of Care | ED Volume and waiting room census associated with shorter time to next ambulance diversion  ED occupancy and LOS showed no association | Good |
| Handel22 | 2009 | USA | Retrospective multicenter | 614,106 patients | ED occupancy  ED LOS  ED volume | Quality of care (days of ambulance diversion) | Higher ED volume and LOS associated with more days of ambulance diversion | Good |
| Harris23 | 2007-2009 | USA | Prospective observational | 210 patients with STEMI | ED Occupancy | Quality of care (timely care) | No association between ED occupancy and time to balloon inflation | Good |
| Hirschy24 | 2013-2014 | USA | Retrospective cohort analysis | 172 patients with severe sepsis or septic shock | Boarding time (< 6 hours, 6 hours or more) | Mortality  Quality of care (Hospital LOS) | No association between boarding time and Mortality or LOS | Fair |
| Hong25 | 2002-2005 | Taiwan | Retrospective cohort analysis | 195 patients with necrotizing fasciitis | Boarding time | Mortality | Elevated boarding time associated with higher mortality | Good |
| Hong26 | 2008-2010 | South Korea | Retrospective observational analysis | 1296 patients with cardiac arrest | ED volume | Mortality  Quality of care (timely care) | Mortality and DRE were higher with higher ED volume | Good |
| Hoot27 | 2006 | USA | Prospective observational | 7,948 observed periods | ED occupancy  EDWIN  NEDOCS | Quality of care (ambulance diversion) | NEDOCS, EDWIN and Occupancy ratio were associated with more ambulance diversion | Good |
| Hoot28 | 2005-2006 | USA | Prospective observational | 23,413 patients | EDWIN  NEDOCS | Quality of care (ambulance diversion) | EDWIN and NEDOCS had good predictive ability for ambulance diversion. | Good |
| Hwang29 | 1997-1998 | USA | Retrospective review of prospective cohort study | 158 patients ≥50 years old with hip fracture | ED Occupancy  ED LOS | Quality of care (timely care) | ED occupancy was associated with less timely documentation but neither occupancy nor LOS had an associating with timely care | Fair |
| Hwang30 | 2005 | USA | Retrospective cohort | 1,068 patients with pain | ED volume  Number of boarders  Boarders’ occupancy | Quality of care (timely care) | High ED Volume and boarders were associated with less receipt of analgesics  And less timely documentation  No association with boarding occupancy | Good |
| Jang31 | 2009-2013 | USA | Retrospective cohort | 4,846 pediatric patients with asthma | ED volume | Quality of care (timely care) | High ED volume associated with lower likelihood of getting Medications within 1 hour of arrival | Good |
| Jo32 | 2008-2009 | South Korea | Retrospective cohort | 477 adults with community-acquired Pneumonia | ED occupancy | Mortality  Quality of care (timely care) | High ED occupancy associated with higher mortality, not associated with time to first antibiotic | Good |
| Jobe33 | 2016 | Belgium | Survey | 158 ED physicians and nurses | ED occupancy  NEDOCS | Perception of care (perception of crowding) | Association between high NEDOCS, high occupancy rate and perception of crowding | Fair |
| Jones34 | 2006 | USA | Survey | 135 sampling of one physician and one nurse | Ed occupancy  EDWIN  NEDOCS | Perception of care (perception of crowding) | High ED occupancy, EDWIN and NEDOCS were correlated with perception of crowding | Good |
| Kang35 | 2008-2012 | South Korea | Prospective observational | 608 patients with out of hospital cardiac arrest | ED occupancy | Mortality | No association between high ED occupancy and mortality | Good |
| Kulstad36 | 2007 | USA | Prospective observational | 6,728 patients | EDWIN | Quality of care | High EDWIN score was correlated with increase medication errors in the ED | Good |
| Kulstad37 | 2007 | USA | Retrospective cohort | 17 patients with acute myocardial infarction | EDWIN | Quality of care (timely care) | High EDWIN was associated with longer time to balloon but no association with ECG or arrival to cath lab | Good |
| Lee38 | 2007-2008 | Taiwan | Prospective | Teaching hospital (adults) | NEDOCS | Quality of care (blood culture contamination rate) | Emergency department overcrowding may have an adverse impact on the quality of clinical care, including increasing the risk of blood culture contamination | Good |
| Liew39 | 2000-2001 | Australia | Retrospective cohort | 17,954 patients | ED LOS | Quality of care (timely care) | High ED LOS was associated with high Hospital LOS | Good |
| Liu40 | 2004-2005 | USA | Retrospective cohort | 1,431 patients with chest pain, cellulitis, or pneumonia | Boarding time | Quality of care (timely care) | Increased boarding time was associated with delay in home medications but not antibiotics, medication errors or adverse events | Good |
| Lord41 | 2013-2015 | USA | Prospective observational | 31,426 patients | Number of boarders | Mortality  Quality of care (RRT activation  Escalation of care) | Number of boarders was not associated with any outcome | Good |
| Mataloni42 | 2012-2014 | Italy | Retrospective | 47 ED, Lazio region, adults | ED Volume  ED LOS | Mortality  Quality of care (hospitalization) | EDV + ED LOS associated with increased risk 7-day hospitalization  EDLOS with increased mortality | Good |
| McCarthy 43 | 2005 | USA | Prospective observational | 93,840 patients | ED occupancy  EDWIN | Quality of care (LWOTS  Ambulance diversion) | High ED occupancy and EDWIN correlated with LWOTS and Ambulance diversion hours | Good |
| McCarthy 44 | 2005-2007 | USA | Retrospective cohort | 235,928 patients | ED occupancy  Number of boarders | Quality of care (timely care) | Number of ED boarders inversely correlated with time to treatment, ED occupancy correlated with time to treatment | Good |
| McCusker45 | 2005 | Canada | Retrospective cohort | 677,475 patients | ED occupancy  ED Waiting room census | Mortality  Quality of care (return to ED) | ED occupancy associated with higher mortality and return visits. Waiting room census associated with increased mortality and less return to ED | Good |
| Mills46 | 2008-2009 | USA | Prospective observational | 767 patients with abdominal pain | ED volume  ED waiting room census  Number of boarders | Quality of care (timely care) | ED volume, waiting room census and number of boarders all associated with increased time from triage to CT read. | Good |
| Mills47 | 2004-2005 | USA | Retrospective Cohort | 976 patients with abdominal pain | ED occupancy  ED LOS  ED Waiting room census  Number of boarders | Time Quality of care (timely care) | All measures were associated with delay to receive analgesia | Good |
| Miro48 | 1995-1997 | Spain | Retrospective cohort | 81,301 patients | ED volume | Mortality  Quality of care (ED revisits) | Correlation between ED volume and mortality rate but not ED revisits | Good |
| Momeni49 | 2014 | Iran | Prospective observational | 104 patients with stroke | Ed occupancy | Quality of care (timely care) | No correlation between increased occupancy and time to physician visit, aspirin administration, ECG or time to CT. | Fair |
| Nippak50 | 2007-2009 | Canada | Retrospective cohort | 4743 patients | ED LOS | Quality of care (Hospital LOS) | Longer ED LOS correlated with higher Inpatient LOS | Fair |
| Peltan51 | 2013-2015 | USA | Retrospective cohort | 3,572 patients with Sepsis | ED volume  ED occupancy  Number of boarders  EDWIN | Quality of care (timely care) | ED volume, occupancy and EDWIN was associated with delay in antibiotic administration and lower likelihood of antibiotics within 3 hours. Number of boarders had no associations. | Good |
| Pines52 | 2003-2005 | USA | Retrospective cohort | 694 patients with CAP | ED waiting room number  ED boarding time  ED LOS  ED Volume | Quality of care (timely care) | ED waiting room census and LOS were associated with lower likelihood of antibiotics within 4 hours. | Good |
| Pines53 | 2004 | USA | Retrospective cohort | Patients from 24 academic centers with Acute MI or Pneumonia | ED LOS  ED Volume | Quality of care (timely care) | Increase in ED LOS was associated with decrease in proportion of patients receiving antibiotics within 4 hours. No association with time to PCI | Good |
| Pines54 | 2008 | USA | Retrospective cohort | 13,758 patients with severe pain | ED waiting room census  ED occupancy | Quality of care (timely care) | ED waiting room census and occupancy are associated with delayed time to analgesia | Good |
| Pines55 | 2006 | USA | Survey | 2,064 patients, physicians and nursing surveys | ED waiting room census  ED boarding time | Perception of care | ED waiting room census and number of boarders were associated with perception of compromised care. | Good |
| Pines56 | 1999-2006 | USA | Retrospective cohort | 4,574 patients with chest pain | ED occupancy  ED waiting room census  ED boarders  ED boarding time  ED LOS | Quality of care (adverse outcomes) | Quality of Care (ECG, aspirin and beta blockers within 10 minutes of ED arrival) had no association with crowding measures. More adverse events occurred with higher waiting room census, LOS but not occupancy, boarders or boarding time | Good |
| Pines57 | 2007-2009 | USA | Retrospective cohort | 1,716 patients with asthma | ED occupancy  ED waiting room census  ED boarders  ED LOS | Quality of care (timely care) | Ed occupancy, LOS, waiting room census, number of boarders associated with increased delays in receiving nebs and steroids | Good |
| Pines58 | 2003-2007 | USA | Retrospective cohort | 5,616 patients with back pain | ED occupancy  ED waiting room census  ED boarders  ED LOS | Quality of care (timely care) | All ED crowding measures were associated with delay to receive analgesia | Good |
| Plunkett59 | 2002-2008 | Ireland | Retrospective cohort | 23,114 patients | ED boarding time | Mortality | Time from admission for was independently associated of death within 30 days | Good |
| Raj60 | 2004-2005 | Australia | Prospective observational | 2,239 patients | NEDOCS | Perception of care | There was little correlation between NEDOCS and perception of care. | Good |
| Rathlev61 | 2002-2003 | USA | Retrospective cohort | 93,274 patients | ED volume | Quality of care (Hospital LOS) | Number of ED admission was associated with higher hospital LOS | Good |
| Reznek62 | 2014-2015 | USA | Cross-sectional observational | 39,781 patients | ED boarding time | Mortality | Association between boarding time and hospital mortality in non-ICU admitted patients but not ICU-admitted patients. | Good |
| Reznek63 | 2014-2015 | USA | Retrospective cohort | 463 patients with stroke | ED occupancy | Quality of care (timely care) | ED occupancy was associated with higher door-to imaging time | Good |
| Richardson64 | 2002-2004 | Australia | Retrospective cohort | 66,608 patients | ED occupancy | Mortality | High occupancy associated with 10-day in hospital mortality | Good |
| Richardson65 | 2006-2007 | Australia | Retrospective cohort | 437 patients with femoral neck fractures | ED boarders | Quality of care (timely care) | Higher ED boarders associated with increased time to surgery | Good |
| Salehi66 | 2015 | Canada | Retrospective cohort | 13,872 patients | ED LOS  ED boarding time | Quality of care (timely care) | ED LOS and boarding time associated with increased hospital LOS | Good |
| Schull67 | 1999 | Canada | Prospective observational | 37,999 patients | ED boarders  ED boarding time | Ambulance diversion | ED boarders and boarding time associated with higher ambulance diversion. | Good |
| Shenoi68 | 2006-2007 | USA | Retrospective cohort | 232 pediatric patients with sickle cell disease | ED volume | Quality of care (timely care) | High ED volume was associated with increased time to analgesia | Good |
| Shin69 | 2008-2012 | South Korea | Retrospective cohort | 770 patients with severe sepsis and septic shock | ED Occupancy | Quality of care (timely care) | High Occupancy rates were associated with decreased compliance with sepsis bundle | Good |
| Sikka70 | 2007-2008 | USA | Retrospective cohort | 262 patients with CAP | ED Occupancy | Quality of care (timely care) | High Occupancy rates correlated with longer time to antibiotics and lower likelihood to receive antibiotics within 4 hours | Fair |
| Sills71 | 2007-2008 | USA | Retrospective cohort | 927 pediatric patients with asthma | ED Occupancy | Quality of Care | High occupancy rates associated with decreased timeliness and effectiveness of beta-agonists and corticosteroids | Good |
| Sills72 | 2007-2008 | USA | Retrospective cohort | 1,229 pediatric patients with acute long bone fractures | Ed Occupancy | Quality of care (timely care) | High occupancy rates associated with decreased timeliness and effectiveness of analgesia administration | Good |
| Singer73 | 2005-2008 | USA | Retrospective cohort | 41,256 patients | ED boarding time | Mortality  Quality of care (timely care) | Ed boarding time was associated with higher mortality and hospital LOS | Good |
| Sprivulis74 | 2000-2003 | Australia | Retrospective cohort | 62,495 patients | Ed occupancy | Mortality | Higher occupancy rates associated with increased mortality | Fair |
| Sri-on75 | 2004-2005 | USA | Retrospective cohort | 1,431 patients | ED boarding time | Quality of care (timely care) | Higher occupancy associated with more delayed home medications, antibiotics administrations and more adverse events | Good |
| Tsai76 | 2008-2013 | Taiwan | Retrospective cohort | 785 patients with strokes | ED volume | Quality of care (timely care) | ED crowding not associated with delayed door-to-needle time, predicted delayed door-to-assessment time & door-to-CT scan time in thrombolysis-eligible stroke patients. Number of attending physicians affected initial assessment and door-to-CT scan times, whereas the number of nurses impacted thrombolytic administration times | Good |
| Van der Linden77 | 2014-2015 | Netherlands | Retrospective cohort | 39,110 patients | ED Occupancy | Mortality  Quality of care | Higher occupancy associated with delayed care but not higher mortality | Good |
| Van der Linden78 | 2016 | Netherlands | Prospective observational survey | 2,166 nurse & ED physician surveys | Modified NEDOCS | Perception of care (perception of crowding) | Modified NEDOCS correlated well with perception of crowding. | Good |
| Verelst79 | 2010-2012 | Belgium | Retrospective cohort | 108,229 patients | ED occupancy | Mortality  Quality of Care | Higher occupancy associated with higher hospital LOS, trend towards more hospital acquired pneumonia, but not higher mortality | Good |
| Wang80 | 2013 | USA | Prospective observational  Survey | 6,854 patients and 88 surveys of physicians and nurses | NEDOCS | Quality of care (LWOT), Perception of care (perception of crowding) | No association between crowding and LWOT or low agreement with perception of crowding | Good |
| Wang81 | 2015-2016 | USA | Prospective observational | 117,442 patients | ED occupancy  EDWIN  NEDOCS | Quality of care (LWOT) | All measures are associated with higher LWOT | Good |
| Ward82 | 2015 | USA | Retrospective cohort | Patients with STEMI | ED LOS | Quality of care (timely care) | Increased ED LOS associated with higher but insignificant door-in-door-out times | Good |
| Watts83 | 2009 | USA | Prospective observational | 1171 patients in a community hospital | ED occupancy  Diversion Status | Quality of care (medication errors) | Error frequency remained relatively constant across the range of crowding when controlling for patient volume via the quantity of orders reviewed. No significant correlation with ED occupancy or diversion status | Good |
| Weiss84 | Study published 2002 | USA | Survey | Urban academic ED | Perception of clinicians  ED volume  Waiting room census  Number of boarders | Perception of care (feeling of being rushed) | The number of people in the waiting room, patients awaiting triage, patients awaiting registration, full patient rooms, hallway patient, patients awaiting beds, and total registered patients correlated with feeling of being rushed | Fair |
| Weiss85 | 2002 | USA | Survey | 8 academic medical centers | ED volume  ED Waiting Room number  Number of boarders  Boarding time | Perception of care (feeling of being rushed) | Results of a five-question reduced model are valid and accurate in predicting the degree of overcrowding in academic centers. Study to develop NEDOCS too | Fair |
| Weiss86 | 2003 | USA | Prospective observational | 1 large academic center | NEDOCS | Quality of care (LWOT) | NEDOCS correlates with LWOT | Good |
| Weiss87 | 2002 | USA | Prospective observational | Pediatric, 1 inner city ED | NEDOCS  ED waiting room number  ED Volume | Perception of care (perception of crowding) | Pediatric ED Overcrowding Scale model was more dependent on waiting room numbers and registered patients than on other issues that led to a different formula for the NEDOCS model | Good |
| Weiss88 | 2004 | USA | Prospective | Level 3 trauma ED | EDWIN  NEDOCS | Perception of care (perception of crowding) | Both scales had high AUCs, correlated well with each other, and showed good discrimination for predicting ED overcrowding | Good |
| Wu89 | 2010-2013 | China | Retrospective Cohort | Urban Tertiary | ED occupancy | Quality of Care | ED crowding associated with poor performance of damage control resuscitation in major trauma patients in ED | Good |
| Zhang90 | 2010-2018 | China | Retrospective | Tertiary Care | ED LOS | Mortality | Prolonged ED LOS is independently associated with increased risk of hospital mortality in patients with sepsis requiring ICU admission | Good |

**Notes:** The table lists the selected 90 studies in alphabetical order, with details about the type of study, country and setting of the studies. The measures used, the outcomes studies and a brief description of the finding is provided. Finally, the rating of the reviewers for each paper is listed.

**Abbreviations:** AUC, area under the curve; CAP, community acquired pneumonia; ED, emergency department; ICU, intensive care unit LOS, length of stay; LWOTS, left without treatments; MI, myocardial infarction.

**Supplementary table 2: Description of outcomes**

| **2.1. ED Occupancy** | | | |
| --- | --- | --- | --- |
| **Outcome** | **Description of the Outcome** | **Positive Association (worse outcomes)** | **No Association** |
| Mortality  6, 12, 17, 32, 35, 45, 64, 69, 74, 77, 79, 89 | Within 10 days of discharge from ED6 In-hospital Mortality12, 17, 35, 69  In hospital mortality at 10 days64, 79  28-day mortality32  30-day mortality 45, 89  Mortality at days 2, 7 and 3074  Mortality at 24 hours and 10 days77 | 6, 32, 45, 64, 74 | 12, 17, 35, 69, 77, 79, 89 |
| Quality of care  11, 14, 17, 21, 23, 29, 32, 35, 43-45, 47, 49, 51, 54, 56-58, 69-71, 77, 79, 81, 83, 89 | Time to CT in Stroke patients11, 49, 63  Time to thrombolysis in Stroke patients11  Receipt of IV fluids within 1 hour in Sepsis 17  Delivery of protocolized Sepsis care17  Time to: balloon inflation in STEMI23  Time to pain assessment, time to pain documentation29  Time to treatment44, 77  Time to pain treatment 29, 47, 54, 58  Time to aspirin, ECG and neurology consultant49  Time to antibiotic17, 32, 51  Time to Asthma medication57, 71  Preventable medical Errors14  Compliance with Sepsis Bundle69  Receipt of antibiotics within 4 hours70  Delays in transfusion and procedures in trauma patients 89  Medication errors83  Hospital LOS79  Time to next ambulance diversion21  Ambulance diversion hours43  Return visits to ED within 30 days 45  Admission to the hospital after return visit45  Adverse outcomes in patients with chest pain56  Neurological outcome 6 months after cardiac arrest35  Hospital acquired pneumonia79  Left without treatment 81  Development of traumatic coagulopathy89 | 14, 43-45, 47, 51, 54, 57, 58, 69-71, 77, 79, 81, 89 | 11, 17, 21, 23, 29, 32, 35, 49, 56, 83 |
| Perception of care 33, 34 | Perception of ED overcrowded33, 34 | 33, 34 | No studies |

| **2.2. ED LOS** | | | |
| --- | --- | --- | --- |
| **Outcome** | **Description of the Outcome** | **Positive Association (worse outcomes)** | **No Association** |
| Mortality 5, 6, 12, 13, 17, 20, 42, 90 | Within 10 days of discharge from ED 6  In-hospital Mortality12, 13, 17, 90  Death at 7 or 30 days after discharge.5  Death 7 days after ED discharge20, 42 | 6, 20, 42, 90 | 5, 12, 13, 17 |
| Quality of care  1, 5, 9, 11, 13, 17, 20-22, 29, 39, 42, 47, 50, 53, 56-58, 66, 82 | Time to CT in Stroke patients11  Time to thrombolysis in Stroke patients11  Receipt of IV fluids within 1 hour in Sepsis17  Delivery of protocolized Sepsis care17  Time to balloon inflation in STEMI13, 53  Time to pain assessment, time to pain documentation29  Door in to door out, STEMI patientst82  Time to pain treatment 29, 47, 58  Time to antibiotic17  Time to ssthma medication57  Receipt of antibiotics within 4 hours53  Appropriate NSTEMI treatment13  Left without being seen20  Time to next ambulance diversion21  Days of Ambulance diversion22  Hospital LOS1, 9, 39, 50, 66  Recurrent Myocardial infarction13  Hospitalization within 7 days of discharge from ED42  Adverse outcomes in patients with chest pain. 56  Admission to the hospital5, 20  Neurological outcome at discharge1  Hospital acquired pneumonia9 | 1, 5, 9, 11, 13, 17, 22, 39, 42, 47, 50, 56-58, 66, 82 | 11, 20, 21, 29, 53 |
| Perception of Care | No studies | No studies | No studies |

| **2.3. ED Volume** | | | |
| --- | --- | --- | --- |
| **Outcome** | **Description of the Outcome** | **Positive Association (worse outcomes)** | **No Association** |
| Mortality5, 26, 42, 48 | In ED or in-hospital Mortality26  Within 7 days of ED discharge42  Death in ED 48  Death at 7 or 30 days after discharge5 | 26, 48 | 5, 42 |
| Quality of Care5, 8, 15, 16, 21, 22, 26, 30, 31, 42, 46, 48, 51, 53, 61, 68, 76 | Appropriate Stroke testing and referrals5  Time from triage to physician8  Time from triage to CT completion76 or CT reading46  Time to administration of analgesics30  Time to receipt of antibiotics51  Receipt of antibiotics within 4 hours15, 16, 53  Receipt of first analgesic within 60 minutes. 68  Receipt of first asthma medication within 60 minutes31  Time to Chest X-ray16  Delayed resuscitation effort26  PCI within 2 hours53  Door to needle for thrombolysis in stroke76  Pain assessment and ordering30  Left without being seen8  Time to next ambulance diversion21  Days of ambulance diversion22  Hospital Length of Stay61  Revisit to ED within 72 hours48  Rates of Hospitalization within 7 days from ED discharge42 | 5, 8, 15, 16, 21, 22, 26, 30, 31, 42, 46, 48, 51, 53, 61, 68, 76 | 53, 76 |
| Perception of care84, 85, 87 . | Perception of ED being overcrowded. 84, 85, 87 | 84, 85, 87 | No studies |

| **2.4. Boarding Time** | | | |
| --- | --- | --- | --- |
| **Outcome** | **Description of the Outcome** | **Positive Association (worse outcomes)** | **No Association** |
| Mortality2, 12, 19, 24, 25, 59, 62, 73 | 30 day in hospital mortality59  In-hospital Mortality2, 12, 19, 24, 25, 62, 73 | 2, 25, 59, 62, 73 | 12, 19, 24, 62 |
| Quality of care 4, 8, 12, 19, 40, 52, 53, 56, 66, 67, 73, 75 | Timely to Home Medications40, 75  Time to laboratory testing40, 75  Time from Triage to physician8  Time to appropriate ACS medications56  PCI within 2 hours53  Time to antibiotic40, 52, 53, 75  Left without being seen8  Ambulance diversion hours67  Hospital LOS 4, 12, 66, 73  Methicillin-resistant staphylococcus aureus infection19  Adverse outcomes in patients with chest pain56 | 8, 12, 40, 66, 67, 73, 75 | 4, 19, 40, 52, 53, 56, 75 |
| Perception of care85 | Feeling overcrowded. 85 | 85 | No studies |

| **2.5. Number of Boarders** | | | |
| --- | --- | --- | --- |
| **Outcome** | **Description of the Outcome** | **Positive Association (worse outcomes)** | **No Association** |
| Mortality  10, 17, 19, 41 | In-hospital Mortality10, 17, 19, 41 | 10 | 17, 19, 41 |
| Quality of care10, 11, 15, 17, 19, 30, 41, 46, 51, 56-58, 65, 67 | Time to CT11, 46  Time to thrombolysis in stroke patients11  Receipt of IV fluids within 1 hour in Sepsis17  Delivery of protocolized sepsis care17  Time to pain assessment, time to pain documentation30  Time to pain treatment30, 58  Time to antibiotic15, 51  Time to asthma medication57  Time to surgery65  Left without being seen19  Ambulance diversion hours67  Hospital Length of stay10  Adverse outcomes in patients with chest pain56  Rapid response team activation41  Care escalation41  ICU Length of stay10  Methicillin-resistant staphylococcus aureus infection19 | 10, 11, 15, 17, 30, 46, 51, 57, 58, 65, 67 | 17, 19, 41, 56 |
| Perception of Care55, 84, 85 | Compromised Care. 55  Feeling of overcrowding. 84, 85 | 55, 84, 85 | No studies |

| **2.6. Waiting Room Census** | | | |
| --- | --- | --- | --- |
| **Outcome** | **Description of the Outcome** | **Positive Association (worse outcomes)** | **No Association** |
| Mortality17, 45 | In-hospital Mortality17  30 day mortality45 | No studies | 17, 45 |
| Quality of care11, 17, 21, 46, 47, 52, 54, 56-58 | Time to CT11, 46  Time to thrombolysis in Stroke patients11  Receipt of IV fluids within 1 hour in Sepsis17  Delivery of protocolized Sepsis care17  Time to pain treatment 47, 54, 58  Time to antibiotic17, 52  Time to Asthma medication57  Time to next ambulance diversion21  Adverse outcomes in patients with chest pain56 | 11, 21, 46, 47, 52, 54, 56-58 | 11, 17 |
| Perception of Care55, 84, 85, 87 | Perception of ED overcrowded. 55, 84, 85, 87 | 55, 84, 85, 87 | No studies |

| **2.7. NEDOCS** | | | |
| --- | --- | --- | --- |
| **Outcome** | **Description of the Outcome** | **Positive Association (worse outcomes)** | **No Association** |
| Mortality | No studies | No studies | No studies |
| Quality of Care27, 28, 38, 78, 80, 81, 86 | Time to treatment 78  Blood culture contamination 38  Ambulance diversion hours. 27, 28  Left without being seen 80, 81, 86 | 27, 28, 38, 78, 81, 86 | 80 |
| Perception of Care3, 18, 33, 34, 60, 78, 87, 88 | Feeling overcrowded. 3, 18, 33, 34, 60, 78, 87, 88 | 3, 18, 33, 34, 60, 78, 87, 88 | No studies |

| **2.8 EDWIN** | | | |
| --- | --- | --- | --- |
| **Outcome** | **Description of the Outcome** | **Positive Association (worse outcomes)** | **No Association** |
| Mortality | No studies | No studies | No studies |
| Quality of care 14, 27, 28, 36, 37, 43, 51, 81 | Time to antibiotics51  Time to balloon inflation in STEMI37  Left without being seen 43, 81  Ambulance diversion hours.27, 28, 37, 43  Preventable medical errors14  Medication errors36 | 14, 27, 28, 36, 37, 43, 51, 81 | No studies |
| Perception of Care7, 34, 88 | Feeling of overcrowded7, 34, 88 | 7, 34, 88 | No studies |

**Notes:** This table categorizes and briefly describes the outcomes studied for each ED crowding measure. The outcomes are grouped into three broad categories: mortality, quality of care and perception of care. The table also separates the studies based on their findings of worse outcome (positive association). Note that some studies have mixed findings of positive and no association.

**Abbreviations:** ACS, acute coronary syndrome; ECG, electrocardiogram; ED, emergency department; LOS, length of stay; NSTEMI, non-ST elevation myocardial infarction;

STEMI, ST elevation myocardial infarction;

References:

1. Akhtar N, Kamran S, Singh R, Cameron P, Bourke P, Khan R, et al. Prolonged Stay of Stroke Patients in the Emergency Department May Lead to an Increased Risk of Complications, Poor Recovery, and Increased Mortality. J Stroke Cerebrovasc Dis. 2016;25(3):672-8.

2. Al-Qahtani S, Alsultan A, Haddad S, Alsaawi A, Alshehri M, Alsolamy S, et al. The association of duration of boarding in the emergency room and the outcome of patients admitted to the intensive care unit. BMC Emerg Med. 2017;17(1):34.

3. Anneveld M, van der Linden C, Grootendorst D, Galli-Leslie M. Measuring emergency department crowding in an inner city hospital in The Netherlands. Int J Emerg Med. 2013;6(1):21.

4. Bayley MD, Schwartz JS, Shofer FS, Weiner M, Sites FD, Traber KB, et al. The financial burden of emergency department congestion and hospital crowding for chest pain patients awaiting admission. Ann Emerg Med. 2005;45(2):110-7.

5. Ben-Yakov M, Kapral MK, Fang J, Li S, Vermeulen MJ, Schull MJ. The Association Between Emergency Department Crowding and the Disposition of Patients With Transient Ischemic Attack or Minor Stroke. Acad Emerg Med. 2015;22(10):1145-54.

6. Berg LM, Ehrenberg A, Florin J, Ostergren J, Discacciati A, Goransson KE. Associations Between Crowding and Ten-Day Mortality Among Patients Allocated Lower Triage Acuity Levels Without Need of Acute Hospital Care on Departure From the Emergency Department. Ann Emerg Med. 2019;74(3):345-56.

7. Bernstein SL, Verghese V, Leung W, Lunney AT, Perez I. Development and validation of a new index to measure emergency department crowding. Acad Emerg Med. 2003;10(9):938-42.

8. Bullard MJ, Villa-Roel C, Bond K, Vester M, Holroyd BR, Rowe BH. Tracking emergency department overcrowding in a tertiary care academic institution. Healthc Q. 2009;12(3):99-106.

9. Carr BG, Kaye AJ, Wiebe DJ, Gracias VH, Schwab CW, Reilly PM. Emergency department length of stay: a major risk factor for pneumonia in intubated blunt trauma patients. J Trauma. 2007;63(1):9-12.

10. Chalfin DB, Trzeciak S, Likourezos A, Baumann BM, Dellinger RP, group D-Es. Impact of delayed transfer of critically ill patients from the emergency department to the intensive care unit. Crit Care Med. 2007;35(6):1477-83.

11. Chatterjee P, Cucchiara BL, Lazarciuc N, Shofer FS, Pines JM. Emergency department crowding and time to care in patients with acute stroke. Stroke. 2011;42(4):1074-80.

12. Derose SF, Gabayan GZ, Chiu VY, Yiu SC, Sun BC. Emergency department crowding predicts admission length-of-stay but not mortality in a large health system. Med Care. 2014;52(7):602-11.

13. Diercks DB, Roe MT, Chen AY, Peacock WF, Kirk JD, Pollack CV, Jr., et al. Prolonged emergency department stays of non-ST-segment-elevation myocardial infarction patients are associated with worse adherence to the American College of Cardiology/American Heart Association guidelines for management and increased adverse events. Ann Emerg Med. 2007;50(5):489-96.

14. Epstein SK, Huckins DS, Liu SW, Pallin DJ, Sullivan AF, Lipton RI, et al. Emergency department crowding and risk of preventable medical errors. Intern Emerg Med. 2012;7(2):173-80.

15. Fee C, Weber EJ, Maak CA, Bacchetti P. Effect of emergency department crowding on time to antibiotics in patients admitted with community-acquired pneumonia. Ann Emerg Med. 2007;50(5):501-9, 9 e1.

16. Fee C, Weber EJ, Bacchetti P, Maak CA. Effect of emergency department crowding on pneumonia admission care components. Am J Manag Care. 2011;17(4):269-78.

17. Gaieski DF, Agarwal AK, Mikkelsen ME, Drumheller B, Cham Sante S, Shofer FS, et al. The impact of ED crowding on early interventions and mortality in patients with severe sepsis. Am J Emerg Med. 2017;35(7):953-60.

18. Garcia-Romero M, Rita-Gafaro CG, Quintero-Manzano J, Angarita AB. NEDOCS vs subjective evaluation, inverted question markIs the health personnel of the emergency department aware of its overcrowding? Colomb Med (Cali). 2017;48(2):53-7.

19. Gilligan P, Winder S, Singh I, Gupta V, Kelly PO, Hegarty D. The Boarders in the Emergency Department (BED) study. Emerg Med J. 2008;25(5):265-9.

20. Guttmann A, Schull MJ, Vermeulen MJ, Stukel TA. Association between waiting times and short term mortality and hospital admission after departure from emergency department: population based cohort study from Ontario, Canada. BMJ. 2011;342:d2983.

21. Han JH, Zhou C, France DJ, Zhong S, Jones I, Storrow AB, et al. The effect of emergency department expansion on emergency department overcrowding. Acad Emerg Med. 2007;14(4):338-43.

22. Handel DA, Pines J, Aronsky D, Genes N, Ginde AA, Hackman J, et al. Variations in crowding and ambulance diversion in nine emergency departments. Acad Emerg Med. 2011;18(9):941-6.

23. Harris B, Bai JC, Kulstad EB. Crowding does not adversely affect time to percutaneous coronary intervention for acute myocardial infarction in a community emergency department. Ann Emerg Med. 2012;59(1):13-7.

24. Hirschy R, Sterk E, Dobersztyn R, Rech MA. Time Spent in the Emergency Department and Outcomes in Patients With Severe Sepsis and Septic Shock. Adv Emerg Nurs J. 2018;40(2):94-103.

25. Hong YC, Chou MH, Liu EH, Hsiao CT, Kuan JT, Lin JC, et al. The effect of prolonged ED stay on outcome in patients with necrotizing fasciitis. Am J Emerg Med. 2009;27(4):385-90.

26. Hong KJ, Shin SD, Song KJ, Cha WC, Cho JS. Association between ED crowding and delay in resuscitation effort. Am J Emerg Med. 2013;31(3):509-15.

27. Hoot NR, Zhou C, Jones I, Aronsky D. Measuring and forecasting emergency department crowding in real time. Ann Emerg Med. 2007;49(6):747-55.

28. Hoot N, Aronsky D. An early warning system for overcrowding in the emergency department. AMIA Annu Symp Proc. 2006:339-43.

29. Hwang U, Richardson LD, Sonuyi TO, Morrison RS. The effect of emergency department crowding on the management of pain in older adults with hip fracture. J Am Geriatr Soc. 2006;54(2):270-5.

30. Hwang U, Richardson L, Livote E, Harris B, Spencer N, Sean Morrison R. Emergency department crowding and decreased quality of pain care. Acad Emerg Med. 2008;15(12):1248-55.

31. Jang H, Ozkaynak M, Ayer T, Sills MR. Factors Associated With First Medication Time for Children Treated in the Emergency Department for Asthma. Pediatr Emerg Care. 2018.

32. Jo S, Kim K, Lee JH, Rhee JE, Kim YJ, Suh GJ, et al. Emergency department crowding is associated with 28-day mortality in community-acquired pneumonia patients. J Infect. 2012;64(3):268-75.

33. Jobe J, Donneau AF, Scholtes B, Ghuysen A. Quantifying emergency department crowding: comparison between two scores. Acta Clin Belg. 2018;73(3):207-12.

34. Jones SS, Allen TL, Flottemesch TJ, Welch SJ. An independent evaluation of four quantitative emergency department crowding scales. Acad Emerg Med. 2006;13(11):1204-11.

35. Kang J, Kim J, Jo YH, Kim K, Lee JH, Kim T, et al. ED crowding and the outcomes of out-of-hospital cardiac arrest. Am J Emerg Med. 2015;33(11):1659-64.

36. Kulstad EB, Sikka R, Sweis RT, Kelley KM, Rzechula KH. ED overcrowding is associated with an increased frequency of medication errors. Am J Emerg Med. 2010;28(3):304-9.

37. Kulstad EB, Kelley KM. Overcrowding is associated with delays in percutaneous coronary intervention for acute myocardial infarction. Int J Emerg Med. 2009;2(3):149-54.

38. Lee CC, Lee NY, Chuang MC, Chen PL, Chang CM, Ko WC. The impact of overcrowding on the bacterial contamination of blood cultures in the ED. Am J Emerg Med. 2012;30(6):839-45.

39. Liew D, Liew D, Kennedy MP. Emergency department length of stay independently predicts excess inpatient length of stay. Med J Aust. 2003;179(10):524-6.

40. Liu SW, Chang Y, Weissman JS, Griffey RT, Thomas J, Nergui S, et al. An empirical assessment of boarding and quality of care: delays in care among chest pain, pneumonia, and cellulitis patients. Acad Emerg Med. 2011;18(12):1339-48.

41. Lord K, Parwani V, Ulrich A, Finn EB, Rothenberg C, Emerson B, et al. Emergency department boarding and adverse hospitalization outcomes among patients admitted to a general medical service. Am J Emerg Med. 2018;36(7):1246-8.

42. Mataloni F, Pinnarelli L, Perucci CA, Davoli M, Fusco D. Characteristics of ED crowding in the Lazio Region (Italy) and short-term health outcomes. Intern Emerg Med. 2019;14(1):109-17.

43. McCarthy ML, Aronsky D, Jones ID, Miner JR, Band RA, Baren JM, et al. The emergency department occupancy rate: a simple measure of emergency department crowding? Ann Emerg Med. 2008;51(1):15-24, e1-2.

44. McCarthy ML, Zeger SL, Ding R, Levin SR, Desmond JS, Lee J, et al. Crowding delays treatment and lengthens emergency department length of stay, even among high-acuity patients. Ann Emerg Med. 2009;54(4):492-503 e4.

45. McCusker J, Vadeboncoeur A, Levesque JF, Ciampi A, Belzile E. Increases in emergency department occupancy are associated with adverse 30-day outcomes. Acad Emerg Med. 2014;21(10):1092-100.

46. Mills AM, Baumann BM, Chen EH, Zhang KY, Glaspey LJ, Hollander JE, et al. The impact of crowding on time until abdominal CT interpretation in emergency department patients with acute abdominal pain. Postgrad Med. 2010;122(1):75-81.

47. Mills AM, Shofer FS, Chen EH, Hollander JE, Pines JM. The association between emergency department crowding and analgesia administration in acute abdominal pain patients. Acad Emerg Med. 2009;16(7):603-8.

48. Miro O, Antonio MT, Jimenez S, De Dios A, Sanchez M, Borras A, et al. Decreased health care quality associated with emergency department overcrowding. Eur J Emerg Med. 1999;6(2):105-7.

49. Momeni M, Vahidi E, Seyedhosseini J, Jarchi A, Naderpour Z, Saeedi M. Emergency Overcrowding Impact on the Quality of Care of Patients Presenting with Acute Stroke. Adv J Emerg Med. 2018;2(1):e3.

50. Nippak PM, Isaac WW, Ikeda-Douglas CJ, Marion AM, VandenBroek M. Is there a relation between emergency department and inpatient lengths of stay? Can J Rural Med. 2014;19(1):12-20.

51. Peltan ID, Bledsoe JR, Oniki TA, Sorensen J, Jephson AR, Allen TL, et al. Emergency Department Crowding Is Associated With Delayed Antibiotics for Sepsis. Ann Emerg Med. 2019;73(4):345-55.

52. Pines JM, Localio AR, Hollander JE, Baxt WG, Lee H, Phillips C, et al. The impact of emergency department crowding measures on time to antibiotics for patients with community-acquired pneumonia. Ann Emerg Med. 2007;50(5):510-6.

53. Pines JM, Hollander JE, Localio AR, Metlay JP. The association between emergency department crowding and hospital performance on antibiotic timing for pneumonia and percutaneous intervention for myocardial infarction. Acad Emerg Med. 2006;13(8):873-8.

54. Pines JM, Hollander JE. Emergency department crowding is associated with poor care for patients with severe pain. Ann Emerg Med. 2008;51(1):1-5.

55. Pines JM, Garson C, Baxt WG, Rhodes KV, Shofer FS, Hollander JE. ED crowding is associated with variable perceptions of care compromise. Acad Emerg Med. 2007;14(12):1176-81.

56. Pines JM, Pollack CV, Jr., Diercks DB, Chang AM, Shofer FS, Hollander JE. The association between emergency department crowding and adverse cardiovascular outcomes in patients with chest pain. Acad Emerg Med. 2009;16(7):617-25.

57. Pines JM, Prabhu A, Hilton JA, Hollander JE, Datner EM. The effect of emergency department crowding on length of stay and medication treatment times in discharged patients with acute asthma. Acad Emerg Med. 2010;17(8):834-9.

58. Pines JM, Shofer FS, Isserman JA, Abbuhl SB, Mills AM. The effect of emergency department crowding on analgesia in patients with back pain in two hospitals. Acad Emerg Med. 2010;17(3):276-83.

59. Plunkett PK, Byrne DG, Breslin T, Bennett K, Silke B. Increasing wait times predict increasing mortality for emergency medical admissions. Eur J Emerg Med. 2011;18(4):192-6.

60. Raj K, Baker K, Brierley S, Murray D. National Emergency Department Overcrowding Study tool is not useful in an Australian emergency department. Emerg Med Australas. 2006;18(3):282-8.

61. Rathlev NK, Chessare J, Olshaker J, Obendorfer D, Mehta SD, Rothenhaus T, et al. Time series analysis of variables associated with daily mean emergency department length of stay. Ann Emerg Med. 2007;49(3):265-71.

62. Reznek MA, Upatising B, Kennedy SJ, Durham NT, Forster RM, Michael SS. Mortality Associated With Emergency Department Boarding Exposure: Are There Differences Between Patients Admitted to ICU and Non-ICU Settings? Med Care. 2018;56(5):436-40.

63. Reznek MA, Murray E, Youngren MN, Durham NT, Michael SS. Door-to-Imaging Time for Acute Stroke Patients Is Adversely Affected by Emergency Department Crowding. Stroke. 2017;48(1):49-54.

64. Richardson DB. Increase in patient mortality at 10 days associated with emergency department overcrowding. Med J Aust. 2006;184(5):213-6.

65. Richardson D, McMahon KL. Emergency Department access block occupancy predicts delay to surgery in patients with fractured neck of femur. Emerg Med Australas. 2009;21(4):304-8.

66. Salehi L, Phalpher P, Valani R, Meaney C, Amin Q, Ferrari K, et al. Emergency department boarding: a descriptive analysis and measurement of impact on outcomes. CJEM. 2018;20(6):929-37.

67. Schull MJ, Lazier K, Vermeulen M, Mawhinney S, Morrison LJ. Emergency department contributors to ambulance diversion: a quantitative analysis. Ann Emerg Med. 2003;41(4):467-76.

68. Shenoi R, Ma L, Syblik D, Yusuf S. Emergency department crowding and analgesic delay in pediatric sickle cell pain crises. Pediatr Emerg Care. 2011;27(10):911-7.

69. Shin TG, Jo IJ, Choi DJ, Kang MJ, Jeon K, Suh GY, et al. The adverse effect of emergency department crowding on compliance with the resuscitation bundle in the management of severe sepsis and septic shock. Crit Care. 2013;17(5):R224.

70. Sikka R, Mehta S, Kaucky C, Kulstad EB. ED crowding is associated with an increased time to pneumonia treatment. Am J Emerg Med. 2010;28(7):809-12.

71. Sills MR, Fairclough D, Ranade D, Kahn MG. Emergency department crowding is associated with decreased quality of care for children with acute asthma. Ann Emerg Med. 2011;57(3):191-200 e1-7.

72. Sills MR, Fairclough DL, Ranade D, Mitchell MS, Kahn MG. Emergency department crowding is associated with decreased quality of analgesia delivery for children with pain related to acute, isolated, long-bone fractures. Acad Emerg Med. 2011;18(12):1330-8.

73. Singer AJ, Thode HC, Jr., Viccellio P, Pines JM. The association between length of emergency department boarding and mortality. Acad Emerg Med. 2011;18(12):1324-9.

74. Sprivulis PC, Da Silva JA, Jacobs IG, Frazer AR, Jelinek GA. The association between hospital overcrowding and mortality among patients admitted via Western Australian emergency departments. Med J Aust. 2006;184(5):208-12.

75. Sri-On J, Chang Y, Curley DP, Camargo CA, Jr., Weissman JS, Singer SJ, et al. Boarding is associated with higher rates of medication delays and adverse events but fewer laboratory-related delays. Am J Emerg Med. 2014;32(9):1033-6.

76. Tsai MT, Yen YL, Su CM, Hung CW, Kung CT, Wu KH, et al. The influence of emergency department crowding on the efficiency of care for acute stroke patients. Int J Qual Health Care. 2016;28(6):774-8.

77. van der Linden N, van der Linden MC, Richards JR, Derlet RW, Grootendorst DC, van den Brand CL. Effects of emergency department crowding on the delivery of timely care in an inner-city hospital in the Netherlands. Eur J Emerg Med. 2016;23(5):337-43.

78. Van Der Linden MC, Van Loon M, Gaakeer MI, Richards JR, Derlet RW, Van Der Linden N. A different crowd, a different crowding level? The predefined thresholds of crowding scales may not be optimal for all emergency departments. Int Emerg Nurs. 2018;41:25-30.

79. Verelst S, Wouters P, Gillet JB, Van den Berghe G. Emergency Department Crowding in Relation to In-hospital Adverse Medical Events: A Large Prospective Observational Cohort Study. J Emerg Med. 2015;49(6):949-61.

80. Wang H, Robinson RD, Bunch K, Huggins CA, Watson K, Jayswal RD, et al. The inaccuracy of determining overcrowding status by using the national ED overcrowding study tool. Am J Emerg Med. 2014;32(10):1230-6.

81. Wang H, Ojha RP, Robinson RD, Jackson BE, Shaikh SA, Cowden CD, et al. Optimal Measurement Interval for Emergency Department Crowding Estimation Tools. Ann Emerg Med. 2017;70(5):632-9 e4.

82. Ward MJ, Baker O, Schuur JD. Association of Emergency Department Length of Stay and Crowding for Patients with ST-Elevation Myocardial Infarction. West J Emerg Med. 2015;16(7):1067-72.

83. Watts H, Nasim MU, Sweis R, Sikka R, Kulstad E. Further characterization of the influence of crowding on medication errors. J Emerg Trauma Shock. 2013;6(4):264-70.

84. Weiss SJ, Arndahl J, Ernst AA, Derlet R, Richards J, Nick TG. Development of a site sampling form for evaluation of ED overcrowding. Med Sci Monit. 2002;8(8):CR549-53.

85. Weiss SJ, Derlet R, Arndahl J, Ernst AA, Richards J, Fernandez-Frackelton M, et al. Estimating the degree of emergency department overcrowding in academic medical centers: results of the National ED Overcrowding Study (NEDOCS). Acad Emerg Med. 2004;11(1):38-50.

86. Weiss SJ, Ernst AA, Derlet R, King R, Bair A, Nick TG. Relationship between the National ED Overcrowding Scale and the number of patients who leave without being seen in an academic ED. Am J Emerg Med. 2005;23(3):288-94.

87. Weiss SJ, Ernst AA, Sills MR, Quinn BJ, Johnson A, Nick TG. Development of a novel measure of overcrowding in a pediatric emergency department. Pediatr Emerg Care. 2007;23(9):641-5.

88. Weiss SJ, Ernst AA, Nick TG. Comparison of the National Emergency Department Overcrowding Scale and the Emergency Department Work Index for quantifying emergency department crowding. Acad Emerg Med. 2006;13(5):513-8.

89. Wu D, Zhou X, Ye L, Gan J, Zhang M. Emergency department crowding and the performance of damage control resuscitation in major trauma patients with hemorrhagic shock. Acad Emerg Med. 2015;22(8):915-21.

90. Zhang Z, Bokhari F, Guo Y, Goyal H. Prolonged length of stay in the emergency department and increased risk of hospital mortality in patients with sepsis requiring ICU admission. Emerg Med J. 2019;36(2):82-7.
